# Supplementary material for: Upgrading Traditional Poly(1,3-dioxolane) Electrolytes via Integrated Design of Ultra-Stable Network for Solid-State Lithium Metal Batteries
Source: Research Square preprint supplement (doi:10.21203/rs.3.rs-2003311/v1), 2022-09-19

**Table of Contents**

PTADOL solid polymer electrolyte with superior high lithium-ion transference number, wide electrochemical stability window, high mechanical strength and excellent thermal stability was prepared, which exhibited as an advanced solid-state electrolyte for solid lithium metal batteries with excellent interfacial compatibility and superior safety at high voltage.

Hao Li#*, Yunfei Du#, Long Zhao#, Chenyu Xiong, Erqing Zhao, Changgong Li*, Shumeng Hao and Weidong Zhou*

**Upgrading Traditional Poly(1,3-dioxolane) Electrolytes via Integrated Design of Ultra-Stable Network for Solid-State Lithium Metal Batteries**


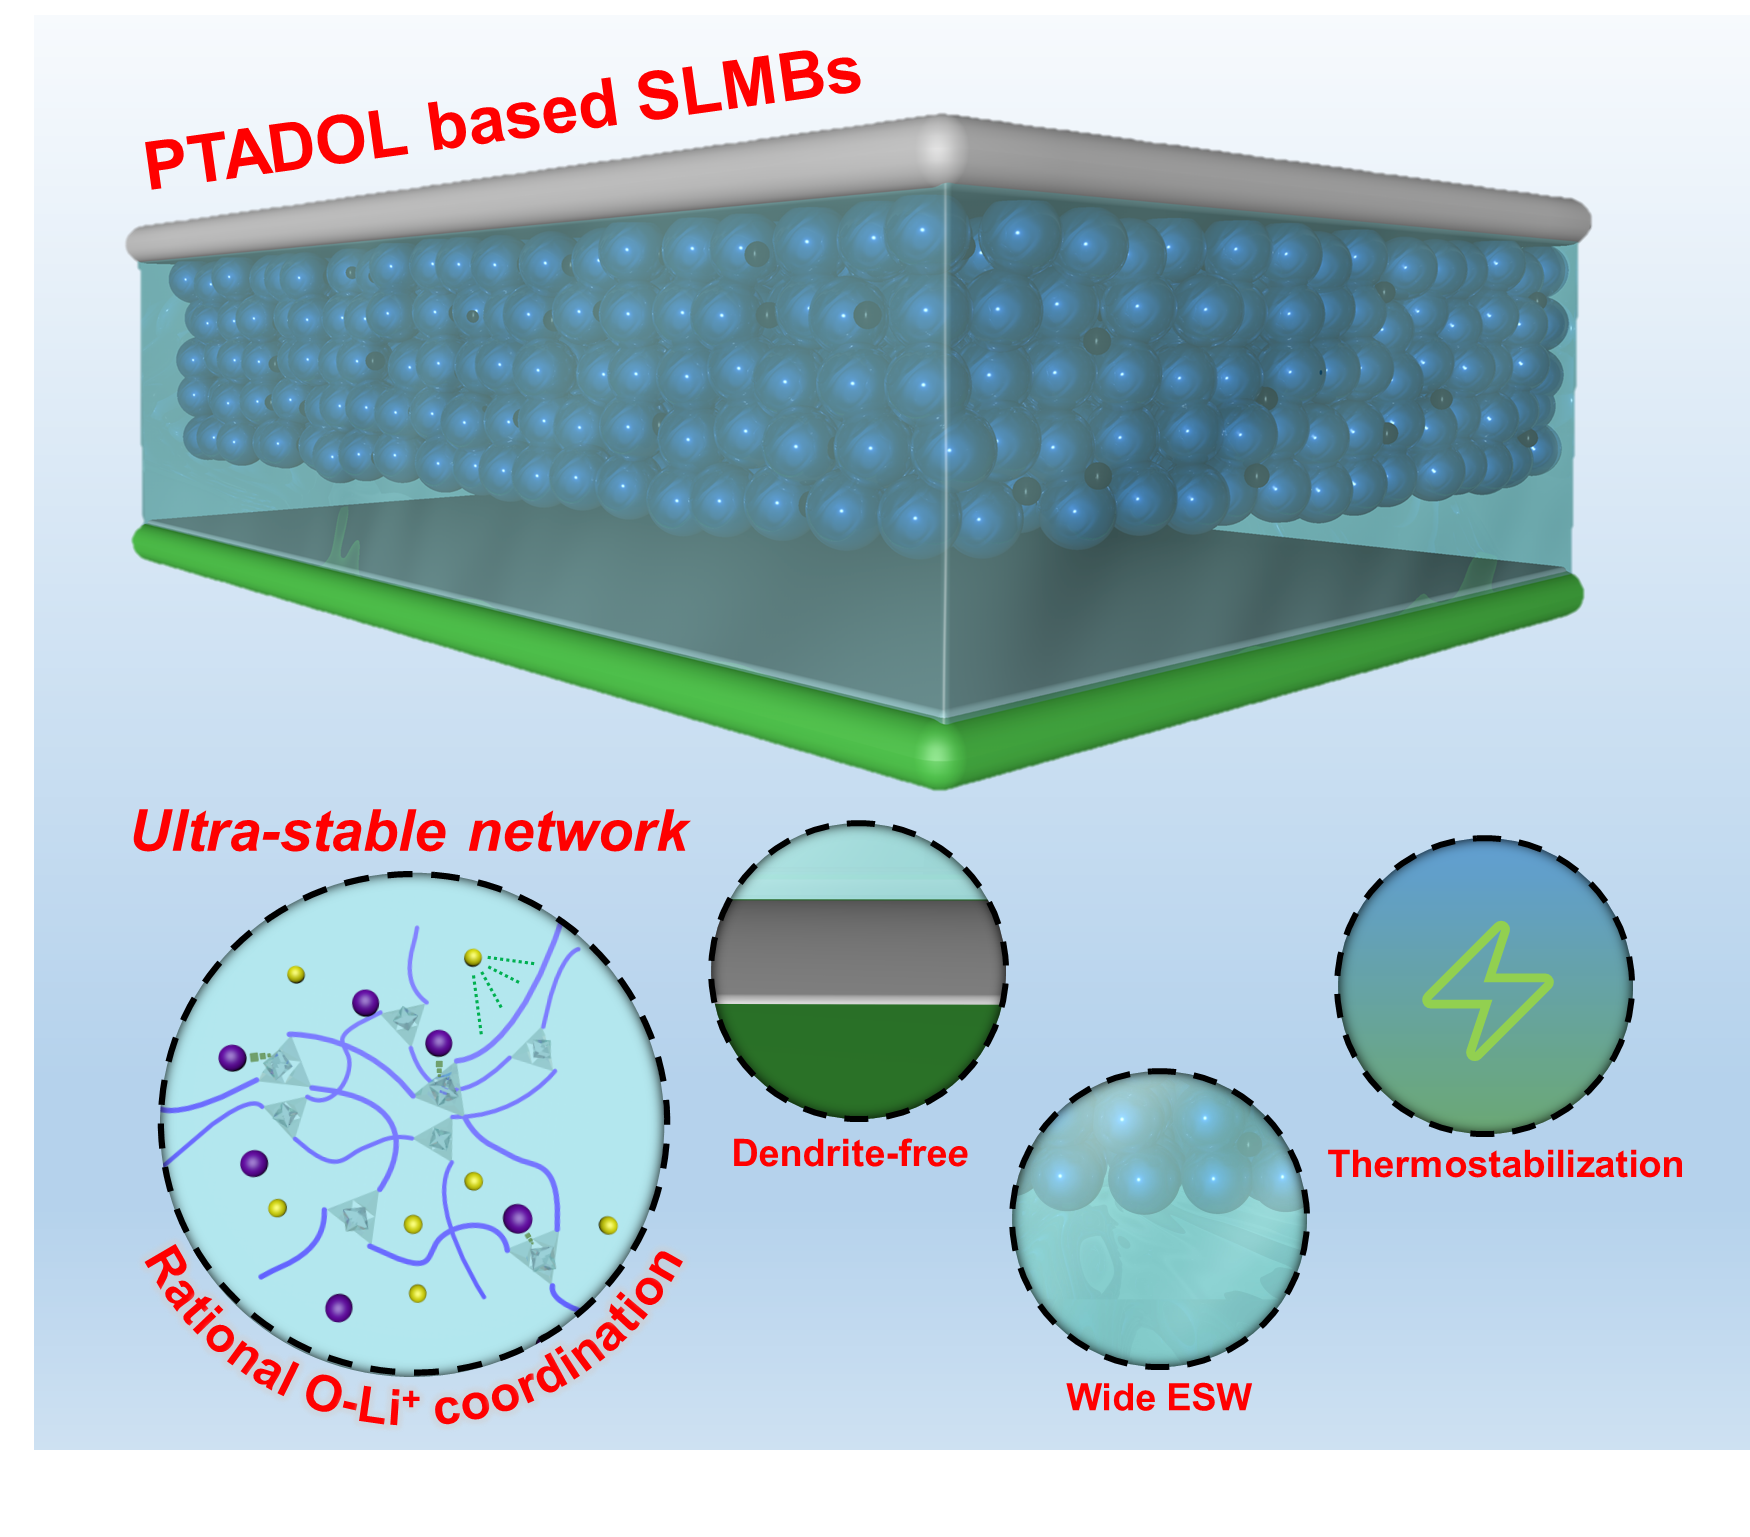

Supplement: Supplementary file 1 [file ee5469d089260c501240337a.docx]
